# Supplementary material for: Tungsten oxide supported on copper ferrite: a novel magnetic acid heterogeneous catalyst for biodiesel production from low quality feedstock
Source: Royal Society of Chemistry journal article supplement (doi:10.1039/d2ra06923g), 2022-01-01
Supplement: d2ra06923g1.pdf [file d2ra06923g1.pdf]

## Supporting Information

### **Tungsten oxide supported on copper ferrite: A novel magnetic acid heterogeneous catalyst for biodiesel production from low quality feedstock**

Hiarla Cristina Lima dos Santos<sup>a</sup>, Matheus Arrais Gonçalves<sup>a</sup>, Alexandre da Cas Viegas<sup>b</sup>, Bruno Apolo Miranda Figueira<sup>c</sup>, Patrícia Teresa Souza da Luz<sup>d</sup>, Geraldo Narciso da Rocha Filho<sup>a</sup>, Leyvison Rafael Vieira da Conceição<sup>a\*</sup>.

<sup>a</sup> Federal University of Pará, Institute of Exact and Natural Sciences, Graduate in Chemistry Program, Laboratory of Catalysis and Oleochemical, 66075–110, Belém, Pará, Brazil.

<sup>b</sup> Federal University of Rio Grande do Sul, Institute of Physics, 90035–190, Porto Alegre, Rio Grande do Sul, Brazil.

<sup>c</sup> Federal University Western Pará, Graduate in Environmental Society and Quality of Life, 68040–255, Santarém, Pará, Brazil.

<sup>d</sup> Federal Institute of Education, Science and Technology of Pará, Department of Education, Science and Teacher Education, 66093–020, Belém, Pará, Brazil.

\*Autor correspondente. Tel.: +55 91 98102 1185.

E-mail address: rafaeltvieira@ufpa.br (Leyvison Rafael Vieira da Conceição).

## Contents

1. WO<sub>3</sub> loading study .....Figure S1
2. Oxidative stability results of the biodiesels .....Table S1

## 1. WO<sub>3</sub> loading study

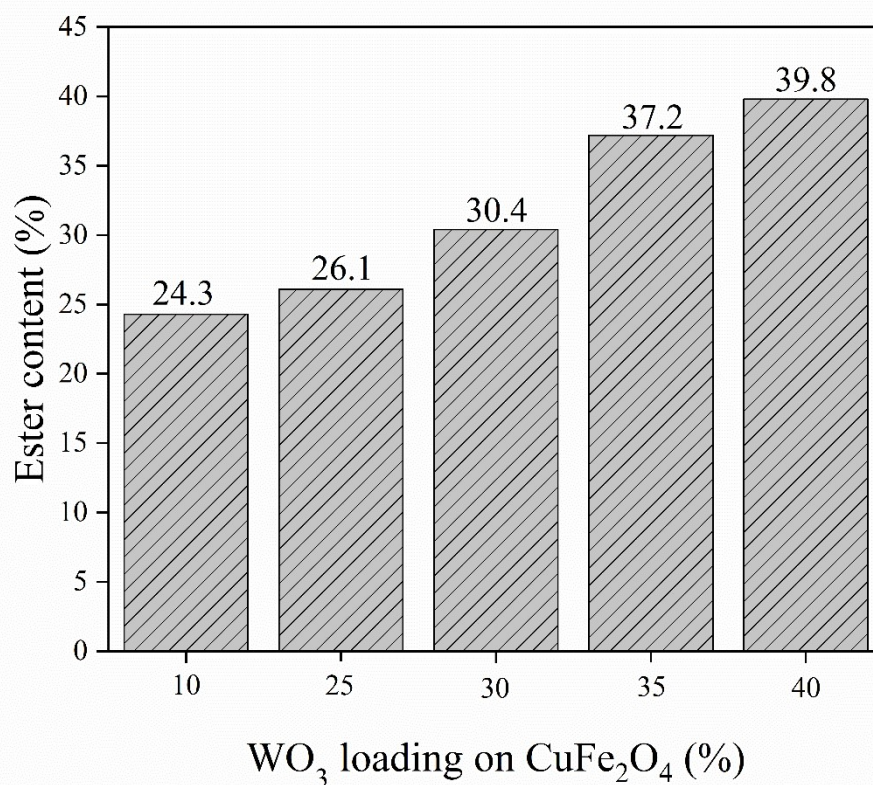

**Fig. S1** Assessment of WO<sub>3</sub> loading on CuFe<sub>2</sub>O<sub>4</sub> magnetic support in transesterification reaction (reaction temperature of 160 °C, reaction time of 3 h, MeOH:oil molar ratio of 35:1, catalyst loading of 6%).

## 2. Oxidative stability results of the biodiesel

**Table S1** Oxidative stability results of the biodiesels obtained in the reaction cycles using  $\text{WO}_3/\text{CuFe}_2\text{O}_4$  magnetic catalyst.

| Reaction cycles | Ester content (%) | Oxidative stability (h) |
|-----------------|-------------------|-------------------------|
| 1               | 94.3              | 4.80                    |
| 2               | 92.9              | 4.61                    |
| 3               | 90.0              | 4.17                    |
| 4               | 86.3              | 3.89                    |
| 5               | 80.6              | 3.33                    |
